# Supplementary material
Source: PubMed Central journal article supplement (PMC3786870)
Supplement: NIHMS512154-supplement-01.pdf [file NIHMS512154-supplement-01.pdf]

SUPPLEMENTAL FIGURES

Lu and Prehoda 2013

Figure S1

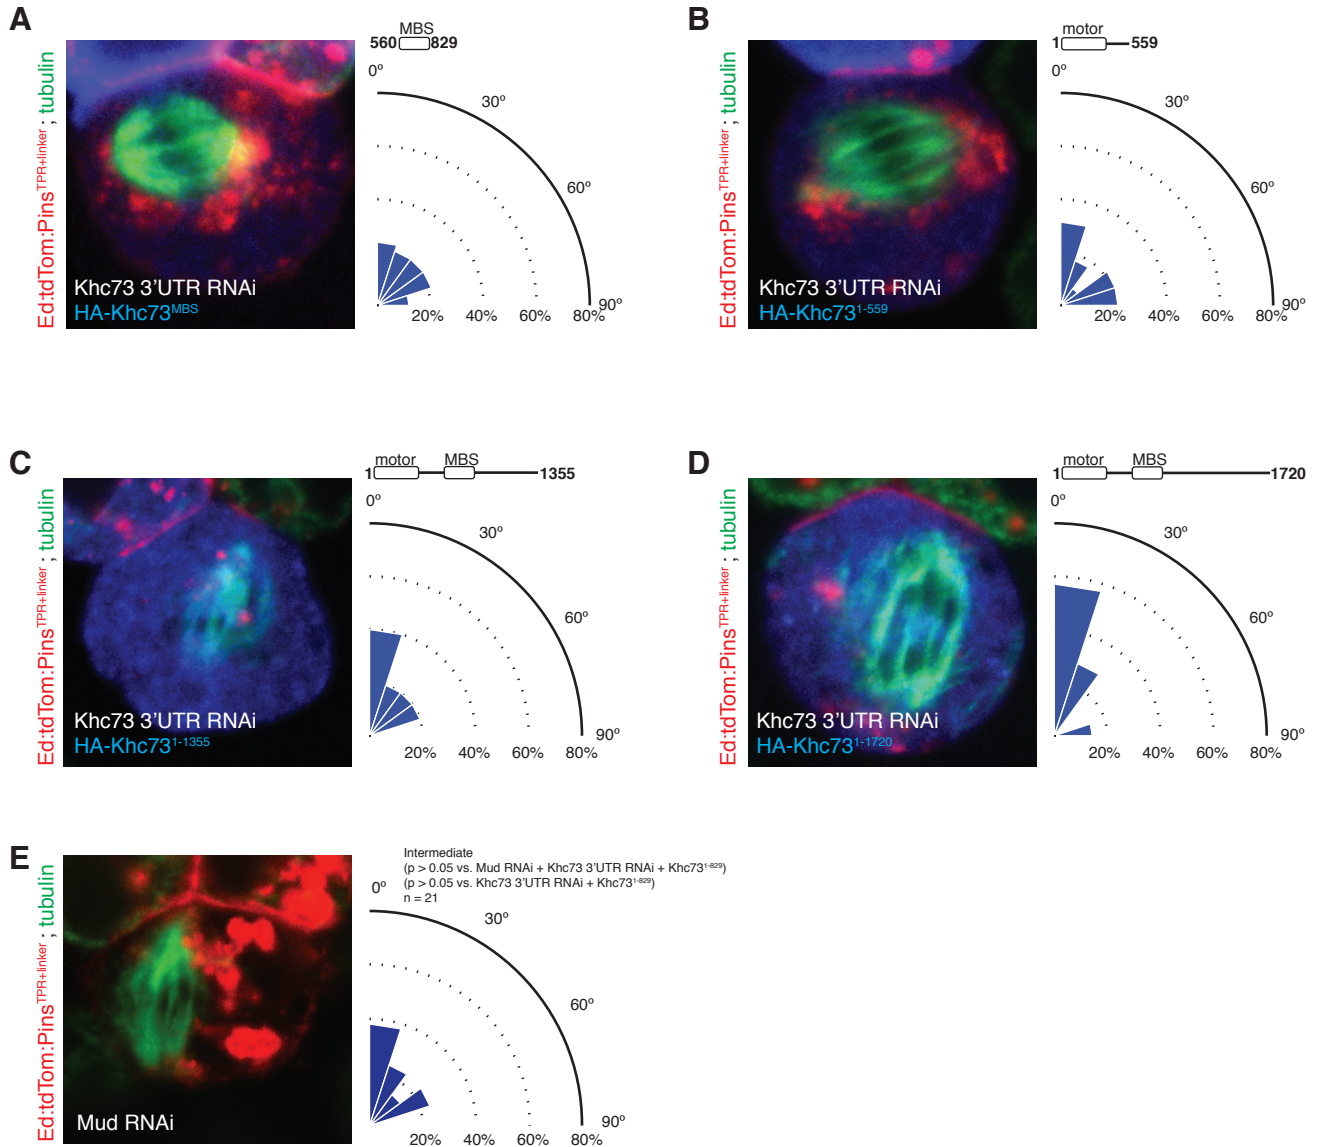

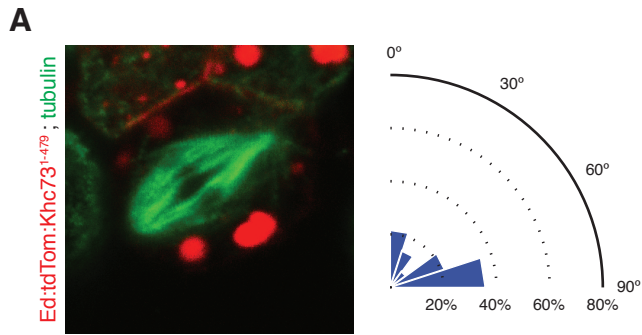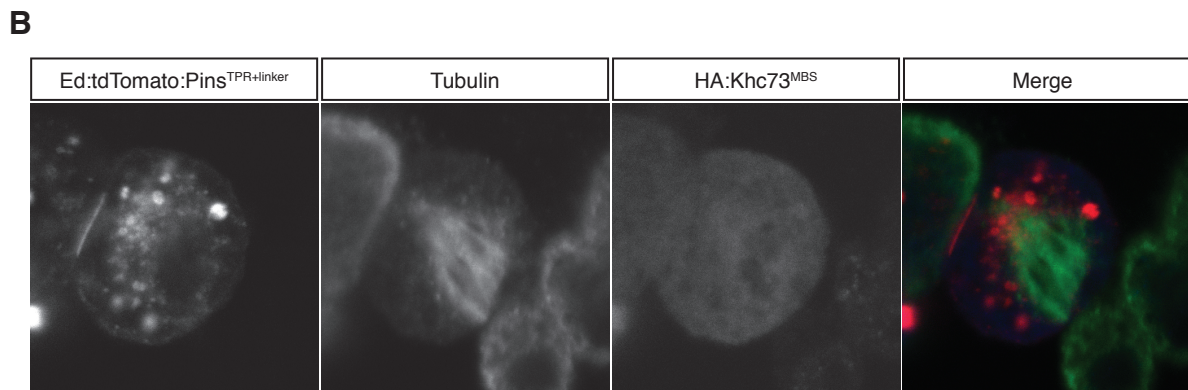

**A**

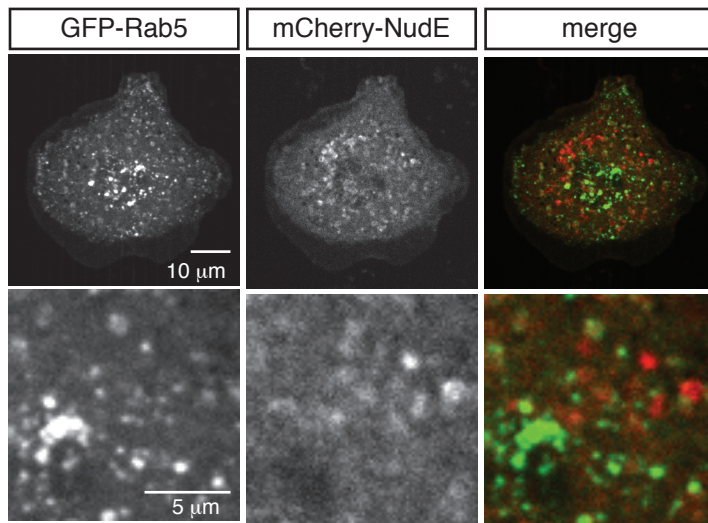

**B**

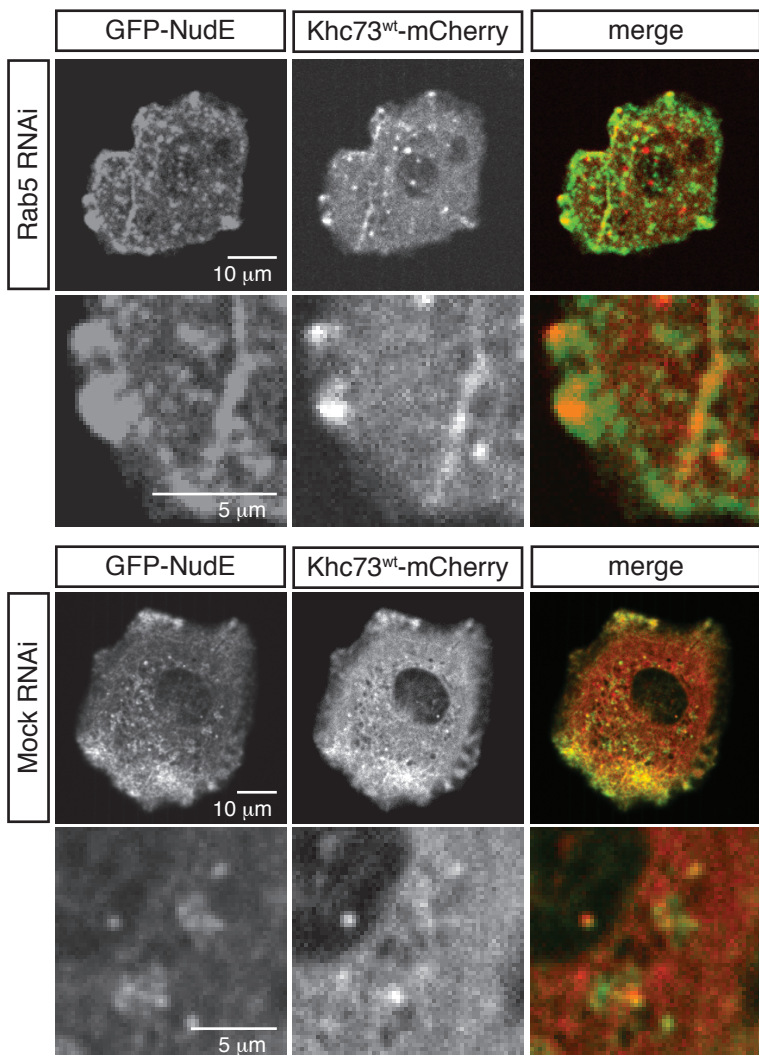

**C**

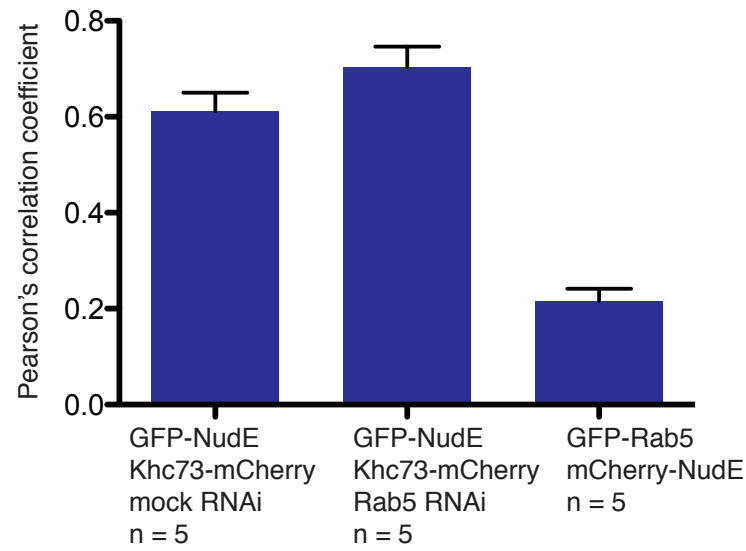

**D**

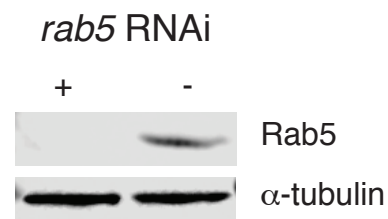

**E**

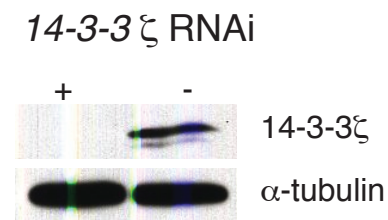

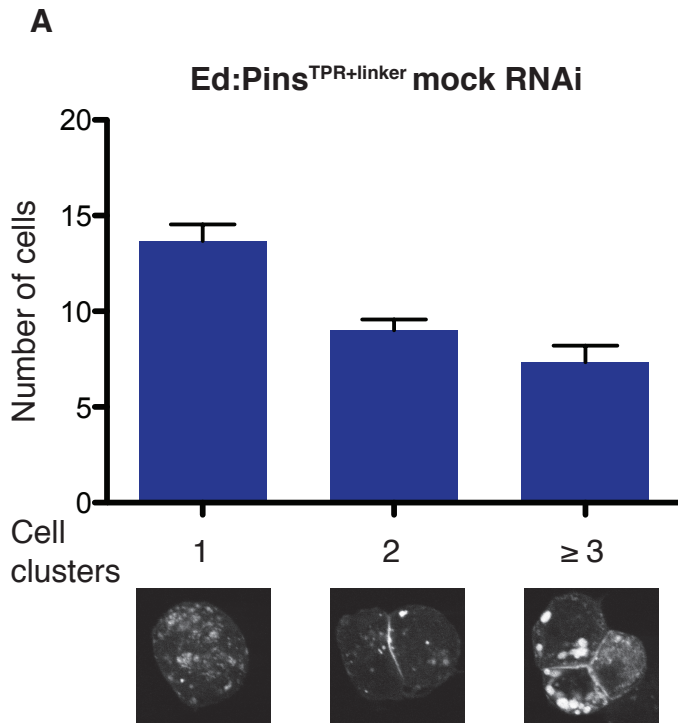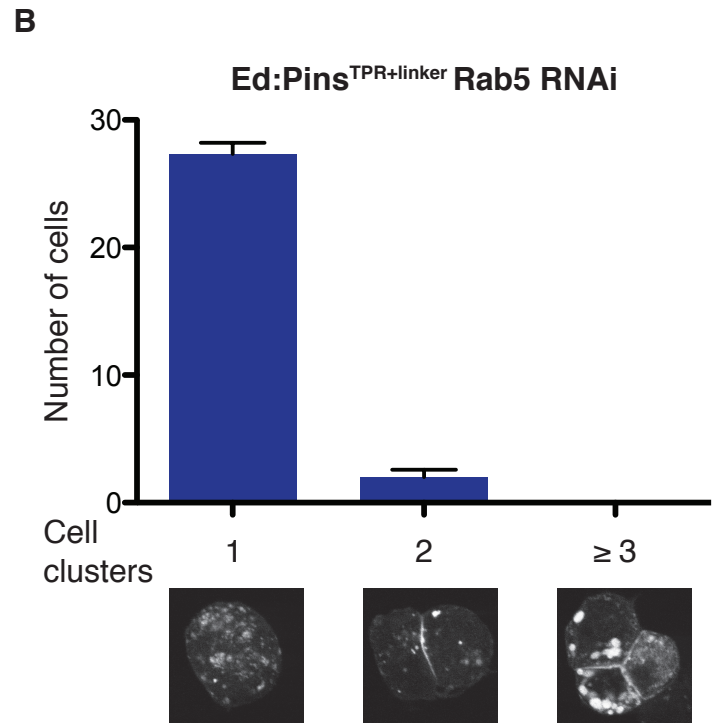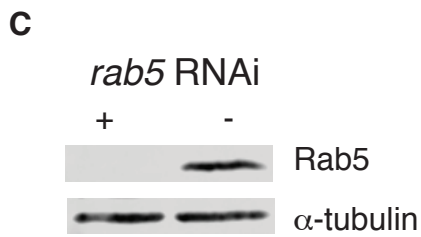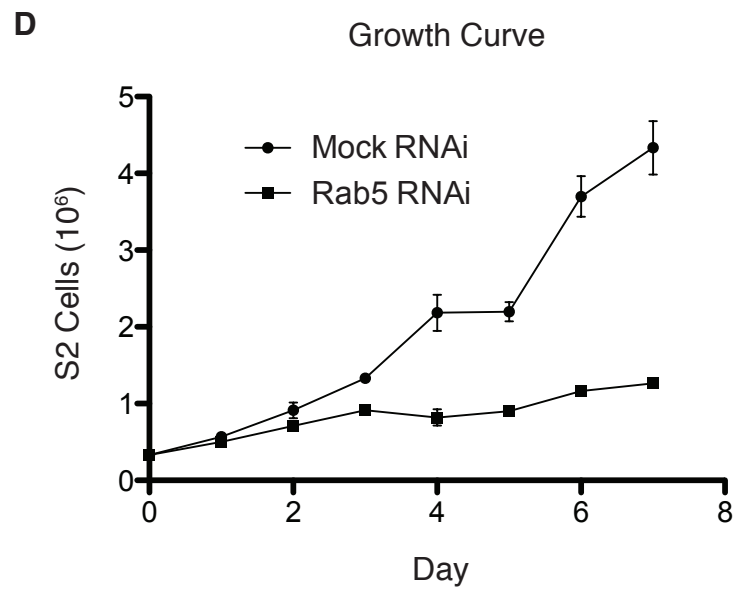



## SUPPLEMENTAL FIGURE LEGENDS

### Figure S1, related to Figure 1. The minimal domains required for spindle orientation rescue include the Motor and MBS domains together.

- (A) The Motor and (B) MBS domains alone are not sufficient for restoring any part of the Pins<sup>TPR+linker</sup> spindle orientation activity, however, rescue constructs containing both domains (C, D) restore activity in part or in full.
- (E) Ed:Pins<sup>TPR+linker</sup> with Mud RNAi control for conditions of figures 1F and 1G.  $P > 0.5$  vs. Ed:Pins<sup>TPR+linker</sup> + Khc73 RNAi + Khc73<sup>1-829</sup> (figure 1F) and  $P > 0.5$  vs. Ed:Pins<sup>TPR+linker</sup> + Khc73 RNAi + Mud RNAi + Khc73<sup>1-829</sup> (figure 1G).

### Figure S2, related to Figure 2. Ed-motor has no activity, MBS does not colocalize with Ed-Pins.

- (A) The motor domain of Khc73 is not sufficient for spindle orientation in the Ed-induced spindle orientation assay. S2 cells expressing Ed:tdTomato:Khc73<sup>motor</sup> do not bias spindle orientation.
- (B) Khc73's Maguk Binding Stalk (MBS) does not localize to Ed-Pins<sup>TPR+linker</sup> crescents.

### Figure S3, related to Figure 4. Rab5 does not play a role in NudE/Khc73 co-localization.

- (A) Still frame from live-imaging of S2 cells expressing GFP-Rab5 and mCherry-NudE reveals that NudE does not localize to Rab5-containing vesicles. S2 cells were plated on ConA-coated chambers.
- (B) Still frame from live-imaging of S2 cells expressing GFP-NudE and Khc73-mCherry in a mock RNAi and Rab5 RNAi background. It appears that Rab5 RNAi slightly improves NudE/Khc73 overlap. S2 cells were plated on ConA-coated chambers.
- (C) Quantification of GFP-Rab5 and mCherry-NudE co-localization demonstrates that these two components do not significantly overlap. Quantification of GFP-NudE and Khc73-mCherry in mock RNAi or Rab5 RNAi conditions reveals that Rab5 knockdown does not significantly affect the co-localization NudE and Khc73.  $n=5$ , mean  $\pm$  S.D. shown.
- (D) Western blot shows knockdown of endogenous Rab5 from S2 cells expressing GFP-NudE and Khc73-mCherry treated with Rab5 RNAi (left lane) compared to cells treated with mock RNAi (right lane). 20  $\mu$ g total lysate was loaded,  $\alpha$ -tubulin shown to demonstrate equal loading.
- (E) Western blot shows knockdown of endogenous 14-3-3 $\zeta$ . 30 $\mu$ g lysate loaded,  $\alpha$ -tubulin used to demonstrate equal loading.

### Figure S4, related to Figure 5. Rab5 RNAi interferes with the induced polarity spindle orientation assay.

- (A) Mock RNAi treatment to S2 cells does not interfere with induction of Ed:Pins<sup>TPR+linker</sup> crescents. Over half of all cells expressing Ed:Pins<sup>TPR+linker</sup> contain one or more Ed:Pins<sup>TPR+linker</sup> score-able crescents. An  $n=30$  was collected for three independent trials. Error bars represent S.E.M.
- (B) Rab5 RNAi treatment to S2 cells expressing Ed:Pins<sup>TPR+linker</sup> inhibits Ed:Pins<sup>TPR+linker</sup> crescent formation. Less than 10% of cells expressing Ed:Pins<sup>TPR+linker</sup> in Rab5 RNAi conditions display Ed crescents, presumably because endocytic trafficking is essential for cortical expression of Ed. An  $n=30$  was collected for three independent trials. Error bars represent S.E.M.

- (C) Western blot shows knockdown of endogenous Rab5 from S2 cells expressing Ed:Pins<sup>TPR+linker</sup> treated with Rab5 RNAi (left lane) compared to cells treated with mock RNAi (right lane). 20 µg total lysate was loaded, α-tubulin shown to demonstrate equal loading.
- (D) Rab5 RNAi treatment (closed squares) severely inhibits S2 cell growth compared to mock RNAi treatment (closed circles) over the course of seven days. Mean and standard deviation from three independent trials of each condition are reported.

**Movie S1, related to figure 2. Khc73 motility on microtubules.**

Khc73-mCherry (red) rapidly moves on microtubules (GFP-αtubulin; green) to the periphery of the cell supporting the idea that it directly interacts with tubulin through its motor domain.

**Movie S2, related to Figure 2. Khc73 moves towards plus ends of MTs and stops at ends, marked by EB1.**

Khc73-mCherry (red) moves along microtubules to the periphery of the cell and stops at microtubule plus ends (marked by GFP-EB1), where it remains in proximity to the cell cortex.

**Movie S3, related to Figure 4. Khc73 and NudE comigrate in S2 cells.**

Khc73-mCherry (red) and GFP-NudE (green) move together toward the periphery of the cell. Interestingly, Khc73 sometimes appears as a comet tail.

**Movie S4, related to Figure 4. Khc73 and NudE travel in opposite directions along a linear path.**

Khc73-mCherry (red) and GFP-NudE (green) can be observed travelling in opposite directions along a linear path, presumably along microtubules, suggesting that NudE is not solely trafficked by the plus-end directed Khc73, but also by minus-end directed Dynein.

## SUPPLEMENTAL EXPERIMENTAL PROCEDURES

### Khc73 sequence

For this study we cloned, in its entirety, Khc73 from a cDNA library generated from *Drosophila* S2 cells. This sequence differs slightly from the sequence deposited in Genbank (Accession: NP\_609201.3). The Khc73 sequence used in this study notably lacks an unconserved region in the C-terminal stalk, near the 14-3-3 binding site. The following is the DNA sequence for this clone of Khc73:

```
ATGGCTAGTGATAAGATCAAAGTCGCCGTAAGGGTGCGACCCTTCAATCGCCGAGAAATCG
AACTAGATACGAAATGTATCGTGGAATGGA AAAACAGCAGACGATACTGCAGAATCCGCC
GCCACTGGAAAAATAGAGAGAAAACAACCAAAGACATTTCGCATTTCGATCACTGCTTTTACT
CATTGAACCCCGAGGACGAGA AACTTTGCGTCCCAGGAGACAGTGTTTCGATTGCGTG GGGAC
GTGGAATTCTGGATAATGCATTCCAGGGCTATAATGCGTG CATATTCGCTTACGGCCAGAC
AGGTTCTGGCAAGTCTACACGATGATGGGCACCCAGGAGAGCAAGGGCATCATTCCACG
TCTGTGTGACCAACTCTTCTCGGCCATAGCCAACAAATCCACACCCGAGCTTATGTACAAG
GTGGAGGTGTCTACATGGAGATCTATAACGAGAAGGTCCACGATCTGCTCGATCCCAAGC
CGAACAAACAGTCGCTTAAGGTGCGCGAGCACAATGTTATGGGCCCATATGTGGACGGACT
GTCGCAGCTGGCTGTGACATCCTATCAGGACATCGATAACCTCATGACCGAAGGCAACAAG
TCACGAACGGTGGCCGCCACCAATATGAATGCCGAGTCGTCGCGCTCCACGCCGTCTTC
TCAGTGGTCTCACTCAGATACTCACGGATCAGGCGACGGGAGTGAGCGGCGAGAAGGTG
```

TCCCGCATGTCCCTGGTGGATTTGGCTGGCTCCGAGCGGGCTGTGAAAACGGGAGCTGTT  
GGCGATCGTCTCAAGGAAGGCTCTAACATCAACAAATCTCTGACCACACTTGGCCTGGTCA  
TCTCCAAGTTGGCCGATCAATCCAATGGCAAGAAGAGCGGTAACGACAAATTCGTTCCCTA  
CCGCGATTCCGTGCTCACCTGGCTGCTGAAAGACAATTTGGGTGGCAATTCAGAACTGTT  
ATGGTAGCGACAATCTCGCCATCGGCAGATAACTACGAGGAGACGCTTTCCACGCTGCGTT  
ATGCAGATCGAGCCAAGCGCATTGTTAACCACGCTGTTGTCAACGAAGATCCCAATGCCCG  
CATCATTCGTGAGCTGCGACACGAGGTGGAGACCCTTAGAAGTATGCTGAAACACGCCACT  
GGTTCACCAGTGGGCGATGTCCAGGATAAGCTGGCTGAGAGCGAGAACCTGATGAAACAG  
ATTTGCGAGACTTGGGAGGAGAAGCTGGTTAAGACAGAACGCATTCAAACGAACGGCAGC  
AGGCTCTAGAGAAAATGGGCATTAGTGTACAGGCCAGTGGCATCAAGGTAGAGAAGAACAA  
GTACTACTTGGTCAATTTAAATGCTGATCCGTCCTTAACGAGCTGCTGGTCTATTATCTGA  
AGGATCGCACACTGATTGGCGGACGCACTATCAGTGGCCAGCAGCCGGATATACTTTT  
CGGTCTCGGAATCCAGCCCAGCACTGTGTGATCACTATCGAGGATAGTGGACTGTACATG  
GAGCCAGTGCAGGGAGCGCGTTGCTTTGTGAACGGATCTGCTGCTGTGGAAAAGACACCA  
CTCCAGAACGGCGACCGTATCCTGTGGGGCAACCACCCTTTTTCCGCGTCAACTCGCCGA  
AGAGCAATAACACTAGTATGTGCGCTTCGGAGCCCCAGACGCCGGCGCAACTGATTGATTA  
CAATTTGCGACGCGATGAGATTATGCAGAACGAATTGAGCAACGATCCTATCCAGACGGCC  
ATTGCTCGGCTGGAACGTCAGCACGAGGAAGATAAGCAGGTGGCGCTTGAAAAACAACGG  
CAGGAGTACGAGCGTCAGTTCAGCAGCTACGCAATATTCTGTGCGCTAGTACACCATATG  
CACCTTATGCTCCTTATGATCCACTGCGCATGGGTAAGATTACCCCAATACTCCTACTTCG  
CAAATGCGAGTGGAAAAGTGGGCACAGGAACGAGATGAGATGTTTCGTCGCAGTTTGGGT  
CAGCTGAAAACGGATATTATGCGTGCGAATTCCCTGGTCCAGGAGGCCAACTTTCTGGCTG  
AGGAGATGGAGAAGAAGACCAAGTTTTTCAGTCACTCTGCAGATTCCGCCAGCTAATCTAAG  
CCCTAACAGAAGGCGTGGGGCATTGTGTCAGCGAACCCGCCATTCTGGTGAAGCGCACAAA  
CTCTGGTAGCCAGATCTGGACGATGGAGAAGCTGGAAAACAAGCTGATAGACATGCGCGA  
GATGTACCAGGAGCACAAAGGAGCGCGTTCTGAACGGACTGCCCTTATAGAGCCATTCTCA  
GAAGACGAGTTCGATGACAAGGACGAGGATAATGCCAAGCCACAGGATCCGTTTTACGAGT  
CGCAAGAGAACCACAATCTTATTGGCGTGGCCAATATATTCTTGGAGGTTCTGTTTTCATGAC  
GTCAAGCTGGACTACCACACGCCCATCATTAGCCAGCAAGGCGAGGTAGCGGGTCCGGCTT  
CAGGTTGAGATCGAGCGGATTGCCGGCCAGATGCCACAGGACCGCATGTGCGAGTCAGTT  
TCAGAATCCTCTGGCGATTACGGGATGAGTACGACGACCCTGTGGATCCACATCGAATC  
AGATTACCTGCCGTGTGACGATCAAGTGCGCCAGTGGACTGCCATTGTGCTCTCCACTT  
TGTCTTTTGGCAGTACACTTTTTGGGGTACCAAGAGATGGTTGTTCCGGTTATCAATGCTG  
AATCAACGGCGCACGACCAGAACATGGTGTTTAAGTTTGAACACACCCAGGACTTCACGGT  
TACCATAAACGAAGAGTTTTTGGAGCACTGCATAGAAGGAGCTCTGTCCATTGAGGTGTGG  
GGCCATCGCAGTGCCGGCTTCTCCAAGACAAAGGGCTGGGAAGTCGAACAGCAGCAAGCC  
AAGGCCCGTTCCCTGGTCGATCGCTGGGCGGAGTTGTCGCGGAAGATCGAGCTTTGGGTG  
GAGATTCACGAGCTTAATGACAACGGCGAGTATTGCCAGTGGAGGTTACCAATCGCAACG  
AGGTCTTGACCGGTGGCATTACCAGTTACGTCAGGGTCAGCAGCGGCGGGTGAATGTAC  
GGGTGAAGCCGGTGCAAACTCTGGCACCTTGCCATTATCTGCCAGTCGATTGTGAACGT  
TGCCATTGGCAGTGTGACAGTGCATCTCGGTTGCAGCGACCACTGGATTCTTACCAGGAG  
GAAGATCTCACCGTGCTGCGCGAGAAGTGGAGCGAAGCACTGGGACGAAGGCGTCAATAC  
CTTGACCAACAGATCCAGATGCTTATAAAGAAAGAGGAGAAGAACGAACAGGAGCGCGAG  
AGGGAGCTAAGCTTGGTTCATCAGTGGGTCTCGTTGACGGAGGAACGCAACGCGGTGTTG  
GTGCCAGCTCCTGGCTCGGGCATTCCCGGAGCACCTGCCTCATGGGAGCCCGCTCCGG  
AATGGAGCCACATGTGCCCGTCTCTTCTCAACCTGAACGGTGACGATCTGTGCGCGCAA  
AACACCAACGACGAGCTCTCCGTGCGCGGCATCAATTCATTCTCTCAAGGAGCACGGAC  
ATAAGTTTTACACGCTGCAAATTCTGCAGCACCTAGATAAGGATGTTTGTGTGTGGCCAGC  
TGGGACTCTTCGATGCATGACAGTCAGGCCCTGAACCGTGTCACTGAGGCCAATGAGCGG

GTCTATCTCATTCTGCGCACAAACGGTACGCCTCTCGCACCCAGCACCTATGGATCTCGTGC  
TCCGCAAGCGACTAAGCATTAAACATCAAGAAGGGACAGACGCTAACCGACCGCCTGAAGA  
AATTCCGTCTTGTGCGGGGAGAGAACGCCATCTGGCAGAGCGGTGTCACCTATGAGGTGG  
TCTCTAACATTCCAAAAGCCTCCGAGGAGTTGGAGGACCGCGAGTCTCTTGCACAGTTGGC  
TGCCAGCGGAGATGATTGCTCCGCAAGTGACGGCGAAACCTACATAGAGAAATACACGCG  
CGGTGTTTTCGGCGGTGGAGAGCATACTGACTCTGGATAGACTGCGGCAGAATGTGGCGGT  
CAAGGAGCTGGAAACGGCACATGGACAGCCGCTCAGCATGCGCAAGACCGTCAGCGTGCC  
GAACCTTCTCACAGATTATGCGCTTCGATGCATCGATGGAGTCGCTGCTGAATGTGGGACGA  
TCCGAGTCCTTTGCCGATCTCAATAACAGCGCTTTGGGCAACAAGTTTACTCCAGCAGGTC  
ATAGTCCAGCAGGAGCAGGCGGAGTCATCCGAAGTCGCCACAGCTTTGGAGGCAAAGGAA  
GCAGCGATGATTCTCCCGGAAAAGCCTTTGGCATTGCTTCGCCAGCTACTAGTAAGCTGCT  
GGGCATGCGCATGACTACGTTGCACGAGGAGCCACTGGGTGGACACAGATCTCTCGACGA  
AGAGCCTGAGGACAGCTACAGCGACTCGGAATATGCTGCCGAGTACGAACAGGAGCGGCA  
GCAGAACAAAAGCATGGCCACGCGATCCCGCCTCACGGCTTCCAAGACCATGGACTCATT  
CATGGACGTCAGCAGCCATTTCGAACCAAAGCTACTTGAGCTACACGTCCAGTGCCAACGCT  
AACATGAAGCACCTGACCGGCCTGGCGACTTTGAGCATGAGCTCATCCACCAGCAGTGGC  
TACGGTTCACAGGCTGTCTCTGCAATAATCTGAGCAACGAGGATATTGCTTCAATGCGTTG  
CATGAGCATTGATGAGACACCAGATTTGATCGCGTAACTCGAATTGCCACCAAACCGG  
CAGGCACGAGTTAACCCCTTTCTCAAGGACATGCCCAAAGCTAAAATACAAGAGCAACCGG  
AACAGCAGGCCAAGAAGCTGCAGGAAGCATTTACGCATCCGTTGGAGCAGCTGGAGTCCA  
GTCAAACGCACAAAGCGACGATGATGAATGCGCGCAACTGCCAAAGAATAATAACAACAA  
CTTGGACTTGGTAAACGAGCCGAAGCCACTTTCAAGCCAAACGGATCTGGAGGAATCTATG  
TCGCAACCTAAATCAAAAACGGAGTTTGCCACAGACAATCAGAACGGCAACAGGTCTCTG  
ACGAGTTAAGCCACAGTTCCGAGGATCTGCTCGAAGGCGATGGCATCGTCCGGGAAGAGT  
TGCCCGCTGGAAAGGTGGTGCGGCGAAAGAAGTCCAATACCCAGCCCCCGAGCAATGGCA  
ACAGCATAAATAACAATAACAACGGCACAACCCAGGCACCGCGCATCAATCATCGGGCATC  
GGTGGCCAAAATGGAGGGTCTGGCTGCATATTTGGATTCTAGCATTATGACCAGCAGCACC  
GAAGTTGATGAGGAGAGCAAGGATGTGGAATTGGTTCTGCCCGAGTGGATAGTGGTGGGC  
GAGTCAGTGTTAATCCGGCCGTATAACACCAGCGGCGTCATTTCGCTTTGTGGGAACCACGG  
AATTCCAACCCGGTGCCTGGATTGGCGTTGAATTGGACACACCAACGGGCAAAAACGACG  
GCAGCGTGAAGGGCGTTTCCAGTGAAGCCCAAGCACGGCATGTTTGTGCGCT  
CCGACAAGCTGATGCTGGACAAGCGTGGCAAGGCGATGCGAGCCTACAAGGCCGCGGAG  
AAGAGCAACAGCATCAGCAAAGAGATGAGTACCTCGATGACTGGCTCGATGACACGCTCCA  
AGAGCCGCGGCGATTTCGCTAAACCTTTCCGGCGCGTAAATGA

## RNAi in S2 cells

RNA interference was performed as follows. Primers for dsRNAs of ~150-400bp with T7 promoter sites targeted to Khc73's 3'UTR, Par-1, NudE, Mud, 14-3-3 $\zeta$ , and 14-3-3 $\epsilon$  were designed using SnapDragon ds-RNA Design service at [http://www.flyrnai.org/cgi-bin/RNAi\\_find\\_primers.pl](http://www.flyrnai.org/cgi-bin/RNAi_find_primers.pl). PCR-amplified templates were transcribed and purified using the Megascript T7 kit (Ambion, Austin, TX). S2 cells were transfected as described above and incubated for 24 hours before being seeded at a density of  $1 \times 10^6$  cells per well in 1 mL of serum-free media. 10-100  $\mu$ g dsRNA was added to the cells and allowed to incubate at room temperature for 1 hr before being supplemented with 2mL serum-containing media. RNAi was induced for 72-96 hrs before fixing.

## Determining RNAi efficiency in S2 cells

RNAi efficiency was determined by Western blotting for 14-3-3 $\zeta$ , RNAi and Rab5 RNAi. For these two conditions, transfected/RNAi-ed S2 cells were lysed in 20mM Tris pH 8.0, 150mM NaCl, 1% NP-40, containing Complete protease inhibitor cocktail (Roche). 20-30 $\mu$ g of cell lysate were probed for 14-3-3 $\zeta$  and Rab5, using  $\alpha$ -tubulin as a loading control. Antibodies were used as follows: 1:1000 Rabbit anti-14-3-3 $\zeta$  (Millipore), 1:1000 Rabbit anti-Rab5 (AbCam), 1:1000 Mouse-anti-DM1A (Santa Cruz).

To determine Khc73 RNAi efficiency for the induced polarity spindle orientation assays, because we could not procure an antibody to Khc73, we verified knockdown of Khc73 by including a Khc73 3'UTR RNAi-only control with every rescue experiment conducted. Khc73 RNAi leads to complete loss of spindle orientation, and only rescue experiments in which the Khc73 RNAi control exhibited random spindle orientation would be analyzed for rescue. Because Khc73 RNAi leads to complete loss of spindle orientation, we conclude that th

### Primers used to generate dsRNA for RNAi experiments in S2 cells

Khc73 3'UTR Forward: 5' taatagcactcactatagggGACTCGACAAGCAACGAACA 3'

Khc73 3'UTR Reverse: 5' taatagcactcactatagggAACGCTTCATTCCAAAATCG 3'

14-3-3  $\zeta$  Forward: 5' taatagcactcactatagggGGGACAACCTGACTCTCTGG 3'

14-3-3  $\zeta$  Reverse: 5' taatagcactcactatagggGCTTTGCTGGTTGCGTTTTA 3'

14-3-3  $\epsilon$  Forward: 5' taatagcactcactatagggCGATCGAACAGAAGGAGGAG 3'

14-3-3  $\epsilon$  Reverse: 5' taatagcactcactataggg ACACCGAGAAGTTCAATGCC 3'

NudE Forward: 5' taatagcactcactataggg CCGCGAAATGGAAATAGAAA 3'

NudE Reverse: 5' taatagcactcactataggg CACTGGGGTAAAGCGTGACT 3'

Par-1 Forward: 5' taatagcactcactataggg TCAAAGCTGGACACGTTCTG 3'

Par-1 Reverse: 5' taatagcactcactataggg GTAGCCATCGCGACTAGAG 3'

Rab5 Forward: 5' taatagcactcactatagggTCAGGACAGTTTTTCAGCGTG 3'

Rab5 Reverse: 5' taatagcactcactatagggTTTCGTCGGTCGATTTGTTT 3'

Mud primer sequences published in Johnston et. al. 2009

### Colocalization quantification

S2 cells expressing GFP-NudE and Khc73<sup>FL</sup>-mCherry or Khc73<sup>S1374A</sup>-mCherry were plated on ConA-coated chambers for 1-2 hours and live-imaged by confocal microscopy using a 100X objective, as described in the main Experimental Procedures section. Still frames from 5 individual cells were analyzed using ImageJ with the LoG 3D plugin, using sigma value 2 or 3 for both GFP-NudE and Khc73<sup>FL</sup>-mCherry or Khc73<sup>S1374A</sup>-mCherry channels to enhance punctae. The enhanced images were then analyzed for colocalization (Pearson's correlation coefficient) using the JACoP colocalization plugin for ImageJ.

### Bacterial Protein Purification

All bacterially-purifiable proteins were expressed in the *E. coli* BL21(DE3) strain induced with 250  $\mu$ M IPTG. For His-tag protein purification, 14-3-3 $\zeta$  and Khc73 (amino acids 580-829) were cloned into a pBH4-based vector containing a cleavable N-terminal 6x Histidine epitope. His-tagged proteins were affinity purified using Ni-NTA resin (QIAGEN, Germantown, MD). For GST-fusion proteins, Dlg isoform G (amino acids 771-975), Khc73 (amino acids 1336-1447), Khc73 (amino acids 1336-1447 S1374D), and 14-3-3 $\epsilon$ , were cloned into the pGEX-4T vector

(GE Lifesciences). GST-tagged proteins were affinity purified on glutathione-agaroses (Invitrogen) and eluted with 10mM reduced glutathione.

### **Cell clustering assay**

To determine whether Rab5 RNAi interfered with cortical Ed:Pins<sup>TPR+linker</sup> expression, thereby impeding its function to polarize Pins<sup>TPR+linker</sup>, we quantified the number of intercellular adhesion events observed for S2 cells expressing Ed:Pins<sup>TPR+linker</sup> in mock RNAi and Rab5 RNAi conditions. S2 cells were transfected with Ed:Pins<sup>TPR+linker</sup>, treated with Rab5 RNAi, and shaken at 175rpm to induce polarization. Cells were fixed, stained, and imaged by confocal microscopy (see materials and methods). Antibody used: 1:1000 mouse anti-DM1A (Santa Cruz). n=30 were collected from S2 cells expressing Ed:Pins<sup>TPR+linker</sup> from three independent trials and scored for non-clustered (i.e. individual cells), cell clusters of 2, or cell clusters of 3 or more.

### **Growth assay**

To determine the effects of Rab5 RNAi on S2 cell growth, the cell densities of mock RNAi- or Rab5-RNAi treated S2 cell cultures were monitored for seven days. 1mL S2 cells (at a density of  $10^6$  cells/mL) were seeded in serum free Schneider's S2 media in a well of a 6-well plate, and either water (mock RNAi) or Rab5 dsRNA were added to the well, and allowed to incubate at room temperature for 1 hour. 2mL Schneider's S2 media containing 10% FBS were added to each well, making the final S2 cell density  $0.33 \times 10^6$  cells/mL. Cell density was measured every 24 hours. Three independent trials were conducted for each condition.
